# Supplementary material
Source: PubMed Central journal article supplement (PMC2715530)
Supplement: 0902598106_0902598106SI.pdf [file 0902598106_0902598106SI.pdf]

# Supporting Information

Eronen et al. 10.1073/pnas.0902598106

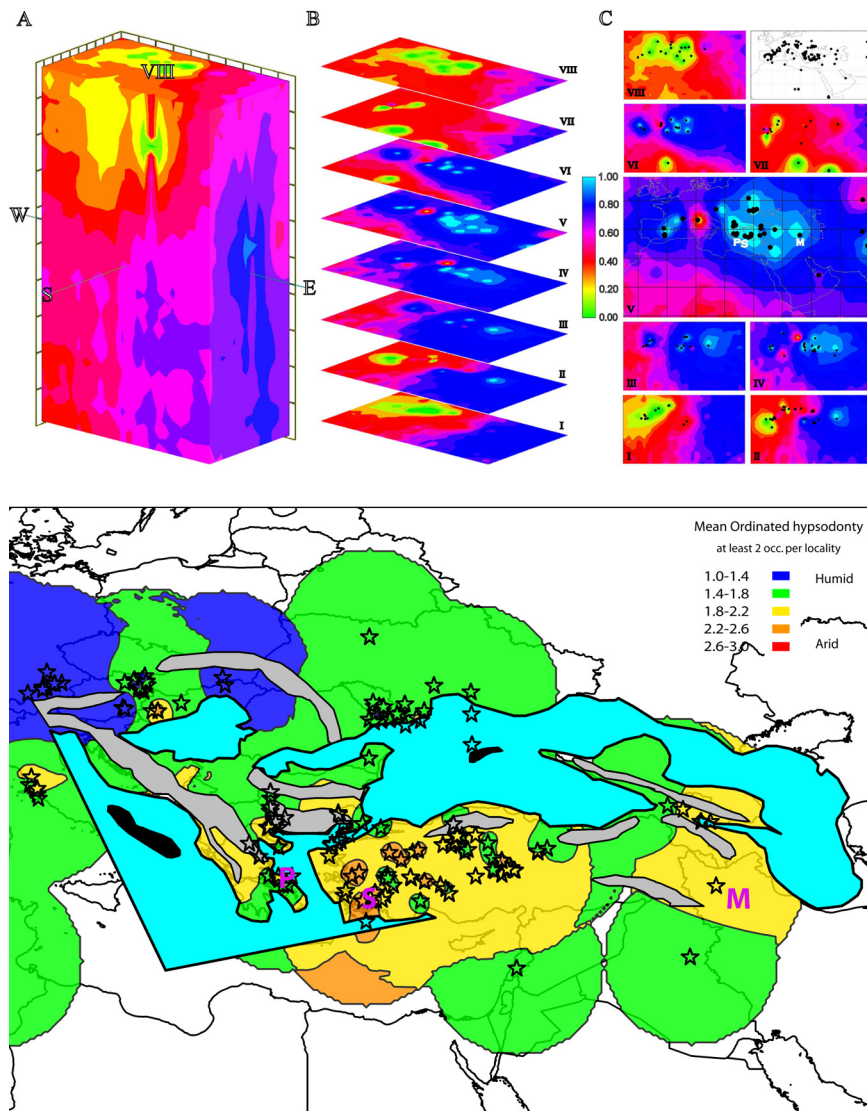

Fig. S1. Full-sized images for Figs. 2 and 3.



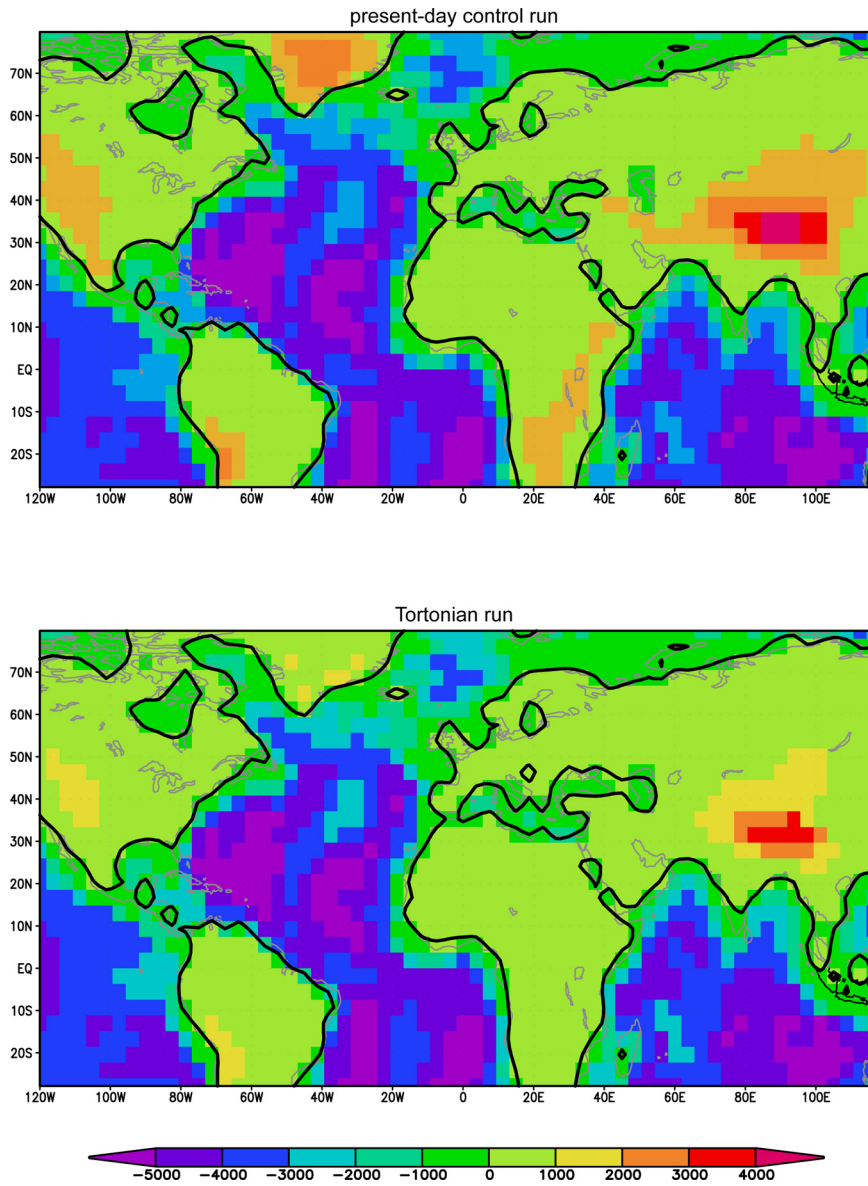

Fig. S3. The land-sea distribution, orography, and bathymetry of the Tortonian and present-day control run.

## Other Supporting Information Files

[Table S1](#)

[Table S2](#)
