# Supplementary material
Source: PubMed Central journal article supplement (PMC2715530)
Supplement: 0902598106_ST1_PDF.pdf [file 0902598106_ST1_PDF.pdf]

TABLE S1 The locality list with age correlation and GFRI values used for GFRI analysis in Figure 2

| Name                          | MN-Unit | Latitude | Longitude | Number of Taxa used | Raup-Crick Index |
|-------------------------------|---------|----------|-----------|---------------------|------------------|
| Anwil                         | MN07    | 47.37    | 7.83      | 9                   | 0.0075           |
| Can Feliu                     | MN07    | 41.5     | -2.13     | 8                   | 0.15             |
| Castell de Barbera            | MN07    | 41.52    | 2.14      | 21                  | 0.0325           |
| Escobosa                      | MN07    | 41.2     | 0.7       | 7                   | 0.4075           |
| Hostalets de Pierola Inferior | MN07    | 41.2     | 0.5       | 24                  | 0.0375           |
| La Grive St. Alban            | MN07    | 44       | 0         | 50                  | 0                |
| Poudenas-Cayron               | MN07    | 44.05    | 0.21      | 9                   | 0.245            |
| Przeworno 2                   | MN07    | 50.7     | 17.2      | 7                   | 0.1175           |
| Saint-Gaudens (Valentine)     | MN07    | 43.1     | 0.71      | 7                   | 0.4425           |
| Sant Quirze                   | MN07    | 41.52    | 2.08      | 23                  | 0.02             |
| Saricay                       | MN07    | 37.33    | 27.79     | 7                   | 0.17             |
| Sofca                         | MN07    | 39.64    | 30.17     | 18                  | 0.355            |
| Steinheim                     | MN07    | 48.7     | 10.05     | 28                  | 0                |

|                 |      |       |       |    |        |
|-----------------|------|-------|-------|----|--------|
| Yeni Eskihsar 1 | MN07 | 37.31 | 28.07 | 7  | 0.695  |
| Akin            | MN09 | 38.4  | 30.32 | 7  | 0.97   |
| Alkcaköy (1-6)  | MN09 | 38.57 | 29.1  | 15 | 0.2975 |
| Atavaska        | MN09 | 47    | 28.8  | 9  | 0.77   |
| Ballestar       | MN09 | 40.4  | 0.11  | 15 | 0.1825 |
| Bou Hanifia     | MN09 | 35.3  | -0.1  | 11 | 0.145  |
| Buzhor 1        | MN09 | 46.56 | 28.16 | 14 | 0.4    |
| Can Ponsic      | MN09 | 41.2  | 0.7   | 21 | 0.22   |
| Can Ponsic I    | MN09 | 41.53 | 2.07  | 29 | 0.405  |
| Charmoille      | MN09 | 47.43 | 7.21  | 14 | 0.355  |
| El Firal        | MN09 | 42.36 | 1.45  | 14 | 0.2025 |
| Eldari I        | MN09 | 41.3  | 45.7  | 17 | 0.9975 |
| Eppelsheim      | MN09 | 49.72 | 8.97  | 30 | 0.13   |
| Esme Akçaköy    | MN09 | 38.4  | 28.96 | 12 | 0.9125 |
| Esselborn       | MN09 | 49.7  | 8.1   | 10 | 0.435  |
| Gau-Weinheim    | MN09 | 49.84 | 8.04  | 7  | 0.4275 |

|                               |      |       |       |    |        |
|-------------------------------|------|-------|-------|----|--------|
| Götzensdorf                   | MN09 | 48    | 16.58 | 11 | 0.145  |
| Hostalets de Pierola Superior | MN09 | 41.2  | 0.5   | 15 | 0.04   |
| Höwenegg                      | MN09 | 47.7  | 8.7   | 8  | 0.8025 |
| Kalfa                         | MN09 | 46.54 | 29.23 | 20 | 0.3575 |
| Los Valles de Fuentidueña     | MN09 | 41    | -4.2  | 19 | 0.0525 |
| Massenhausen                  | MN09 | 48.4  | 11.8  | 12 | 0.155  |
| Middle Sinap                  | MN09 | 40.56 | 32.7  | 16 | 0.825  |
| Nombrevilla                   | MN09 | 41.07 | -1.21 | 10 | 0.4175 |
| Pentalophos 1 (PNT)           | MN09 | 41    | 23    | 17 | 0.96   |
| Rudabánya                     | MN09 | 48.71 | 20.63 | 28 | 0.3575 |
| Sant Miquel de Taudell        | MN10 | 41.55 | 1.98  | 14 | 1      |
| Santiga                       | MN09 | 41.2  | 0.5   | 13 | 0.225  |
| Subsol de Sabadell            | MN09 | 41.33 | 2.07  | 14 | 0.795  |
| Udabno I                      | MN10 | 41.31 | 45.23 | 12 | 0.995  |
| Varnitsa                      | MN09 | 47.2  | 28.9  | 9  | 0.4925 |
| Wartenberg                    | MN09 | 48.4  | 11.98 | 8  | 0.11   |

|                         |      |       |       |    |        |
|-------------------------|------|-------|-------|----|--------|
| Wissberg                | MN09 | 49.85 | 8.02  | 17 | 0.0725 |
| Vösendorf               | MN09 | 48.1  | 16.31 | 8  | 0.9475 |
| Can Llobateres I        | MN10 | 41.2  | 0.7   | 43 | 0.2175 |
| Can Purull              | MN10 | 41.55 | 1.97  | 21 | 0.995  |
| Grossulovo              | MN10 | 47.35 | 30    | 7  | 0.995  |
| Gülpinar                | MN10 | 39.53 | 26.11 | 12 | 1      |
| La Roma 2               | MN10 | 40.66 | -1.01 | 11 | 0.9825 |
| La Tarumba I            | MN10 | 41.55 | 1.97  | 14 | 0.5925 |
| Montredon               | MN10 | 44.4  | 3.36  | 14 | 0.99   |
| Poksheshty              | MN10 | 47.24 | 28.68 | 13 | 0.9825 |
| Ravin de la Pluie (RPL) | MN10 | 41    | 22.95 | 14 | 0.9925 |
| Ravin des Zouaves 1     | MN10 | 41    | 22.95 | 8  | 0.9475 |
| Respopeny               | MN10 | 47.45 | 28.36 | 7  | 0.98   |
| Sinap 12                | MN10 | 40.56 | 32.7  | 19 | 0.62   |
| Soblay                  | MN10 | 45.1  | 5.5   | 8  | 0.8775 |
| Terrassa                | MN10 | 41.56 | 2     | 21 | 0.9875 |

|                            |      |       |       |    |        |
|----------------------------|------|-------|-------|----|--------|
| Xirochori 1 (XIR)          | MN10 | 41    | 23    | 9  | 0.7775 |
| Yulafli (CY)               | MN10 | 41.2  | 27.82 | 12 | 0.9625 |
| Bala Yaylaköy              | MN11 | 39.74 | 33.08 | 10 | 0.9925 |
| Corakyerler                | MN11 | 40.6  | 33.63 | 9  | 0.9775 |
| Crevillente 2              | MN11 | 38.4  | -0.5  | 14 | 1      |
| Csakvar                    | MN11 | 47.4  | 18.5  | 21 | 0.1875 |
| Djebel Krechem el Artsouma | MN11 | 34    | 9     | 9  | 0.4875 |
| Dorn Dürkheim 1            | MN11 | 49.77 | 8.26  | 35 | 0.88   |
| Garkin                     | MN11 | 38.41 | 30.31 | 18 | 0.9975 |
| Injana                     | MN11 | 34.33 | 44.66 | 15 | 0.8675 |
| Kalimanci 1                | MN11 | 42.5  | 23.1  | 11 | 0.9975 |
| Karacahasan                | MN11 | 39.86 | 33.24 | 17 | 0.9925 |
| Kayadibi                   | MN11 | 37.21 | 30.8  | 14 | 0.77   |
| Kemiklitepe D              | MN11 | 37.5  | 29    | 10 | 0.955  |
| Kocherinovo 2              | MN11 | 42.03 | 23.08 | 7  | 0.9775 |
| Kujalnitskij liman         | MN11 | 46.5  | 30.8  | 7  | 0.99   |

|                          |      |       |       |    |        |
|--------------------------|------|-------|-------|----|--------|
| Küçükçekmece             | MN11 | 40.98 | 28.76 | 20 | 0.99   |
| Lower Maragheh           | MN11 | 38    | 46    | 9  | 0.9925 |
| Nikiti 1 (NKT)           | MN11 | 40    | 23.5  | 15 | 0.9975 |
| Piera                    | MN11 | 41.2  | 0.5   | 13 | 0.99   |
| Puente Minero            | MN11 | 40.36 | -1.08 | 16 | 0.9925 |
| Pyrgos Vassilissis       | MN11 | 38.01 | 23.73 | 7  | 1      |
| Ravin des Zouaves 5      | MN11 | 41    | 22.95 | 21 | 1      |
| Strumyani 2              | MN11 | 42.83 | 23.1  | 10 | 1      |
| Akgedik-Bayir            | MN12 | 37.25 | 28.25 | 11 | 1      |
| Akkasdagi                | MN12 | 38.49 | 33.64 | 26 | 1      |
| Baltavar                 | MN12 | 47    | 17    | 16 | 0.9975 |
| Baynunah                 | MN12 | 24.16 | 52.56 | 13 | 0.68   |
| Belka                    | MN12 | 50.81 | 28.18 | 14 | 0.9975 |
| Cerro de la Garita       | MN12 | 40.38 | -1.08 | 27 | 1      |
| Chimishlija (Cimislia)   | MN12 | 46.5  | 28.8  | 23 | 0.9975 |
| Chobruchi (Tchobroutchi) | MN12 | 46.6  | 29.7  | 18 | 1      |

|                       |      |       |       |    |        |
|-----------------------|------|-------|-------|----|--------|
| Chomateres            | MN12 | 38.08 | 23.88 | 12 | 1      |
| Cobanpinar (Sinap 42) | MN12 | 40.21 | 32.53 | 14 | 0.8975 |
| Concud                | MN12 | 40.4  | -1.13 | 20 | 1      |
| Crevillente 15        | MN12 | 38.25 | -0.8  | 10 | 0.9975 |
| Duzyayla              | MN12 | 39.92 | 37.31 | 9  | 1      |
| Gorna Susica          | MN12 | 41.83 | 23.08 | 7  | 0.9675 |
| Grebeniki             | MN12 | 46.88 | 29.81 | 21 | 1      |
| Gura-Galben           | MN12 | 46.42 | 28.42 | 9  | 0.715  |
| Gusinyy perelyot      | MN12 | 50.25 | 67.83 | 22 | 0.5375 |
| Hadjidimovo-1         | MN12 | 41.5  | 23.83 | 27 | 1      |
| Halmyropotamos (HAL)  | MN12 | 38.5  | 24.2  | 20 | 1      |
| Kalimanci 2           | MN12 | 42.5  | 23.1  | 19 | 1      |
| Kavakdere (Turolian)  | MN12 | 40.24 | 32.56 | 7  | 0.3875 |
| Kefraya               | MN12 | 33.75 | 35.75 | 10 | 1      |
| Kemiklitepe 1,2       | MN12 | 38.39 | 29.14 | 21 | 1      |
| Kemiklitepe A-B       | MN12 | 37.5  | 29    | 15 | 1      |

|                       |      |       |       |    |        |
|-----------------------|------|-------|-------|----|--------|
| Kerassia 4            | MN12 | 38.5  | 23    | 15 | 1      |
| Kizilören             | MN12 | 37.85 | 32.1  | 9  | 0.9925 |
| Los Aljezares         | MN12 | 37.75 | -0.85 | 8  | 0.99   |
| Los Mansuetos         | MN12 | 40.35 | -1.11 | 24 | 1      |
| Mahmutgazi            | MN12 | 38.02 | 29.4  | 11 | 0.9825 |
| Middle-Upper Maragheh | MN12 | 38    | 46    | 40 | 1      |
| Molayan               | MN12 | 34.31 | 69.41 | 16 | 1      |
| Monte Bamboli         | MN12 | 43.2  | 10.7  | 7  | 0.1725 |
| Mt. Luberon           | MN12 | 43.7  | 5.4   | 8  | 0.99   |
| Mytilinii 1A          | MN12 | 37.75 | 26.96 | 17 | 1      |
| Novaja Emetovka       | MN12 | 46.65 | 30.6  | 17 | 1      |
| Novo-Elizavetovka     | MN12 | 47    | 31    | 17 | 1      |
| Perivolaki            | MN12 | 38.41 | 23.5  | 24 | 1      |
| Pikermi               | MN12 | 38.01 | 23.99 | 46 | 1      |
| Pinaryaka             | MN12 | 41.19 | 32.49 | 10 | 0.995  |
| Prochoma              | MN12 | 41    | 22.93 | 15 | 1      |



|                     |      |       |       |    |        |
|---------------------|------|-------|-------|----|--------|
| Ravin Ar.           | MN12 | 38.41 | 23.48 | 8  | 0.9875 |
| Ravin X             | MN12 | 38.4  | 23.48 | 14 | 1      |
| Salihpasalar        | MN12 | 37.25 | 28.27 | 16 | 1      |
| Serefköy            | MN12 | 37.36 | 28.22 | 12 | 1      |
| Sinap 26            | MN12 | 40.56 | 32.64 | 13 | 0.8675 |
| Sor                 | MN12 | 39.27 | 67.65 | 11 | 0.8075 |
| Thermopigi          | MN12 | 41.28 | 23.36 | 18 | 1      |
| Tudorovo            | MN12 | 46.26 | 30.03 | 8  | 1      |
| Vathylakkos 3 (VAT) | MN12 | 41    | 23    | 21 | 1      |
| Arquillo 1          | MN13 | 40.4  | -1.1  | 18 | 1      |
| Baccinello V3       | MN13 | 42.7  | 11.1  | 13 | 0.4325 |
| Brisighella         | MN13 | 44.5  | 11.6  | 12 | 0.8975 |
| Casino              | MN13 | 43.5  | 11.2  | 7  | 0.1475 |
| Dytiko 1 (DTK)      | MN13 | 41    | 23    | 18 | 1      |
| El Arquillo 1       | MN13 | 40.35 | -1.05 | 20 | 1      |
| Gravitelli          | MN13 | 38.2  | 15.5  | 10 | 1      |

|                        |      |       |       |    |        |
|------------------------|------|-------|-------|----|--------|
| Las Casiones           | MN13 | 40.43 | -1.11 | 19 | 0.9975 |
| Maramena               | MN13 | 41.29 | 23.81 | 16 | 0.9875 |
| Milagros               | MN13 | 41.35 | -3.41 | 9  | 0.995  |
| Polgardi               | MN13 | 47    | 18.3  | 15 | 0.99   |
| Samos Main Bone Beds   | MN12 | 37.5  | 26.87 | 47 | 1      |
| Sandikli Kinik         | MN13 | 38.56 | 30.13 | 15 | 1      |
| Taraklia               | MN13 | 46.5  | 29    | 27 | 1      |
| Titov Veles            | MN13 | 41.71 | 21.77 | 10 | 1      |
| Toros-Menalla (TM-266) | MN13 | 16.24 | 16.25 | 16 | 0.11   |
| Venta del Moro         | MN13 | 39.4  | -0.4  | 22 | 0.7525 |
| Alcoy                  | MN14 | 38.6  | -0.5  | 10 | 0.0425 |
| Aramis                 | MN14 | 10.28 | 40.27 | 18 | 0.0375 |
| As Duma                | MN14 | 11.15 | 40.31 | 15 | 0.04   |
| Awash 4,5              | MN14 | 10.3  | 40.25 | 22 | 0.0575 |
| Awash 7                | MN14 | 10.5  | 40.65 | 43 | 0      |
| Beresti                | MN14 | 46.05 | 27.53 | 7  | 0.395  |

|                  |      |       |       |    |        |
|------------------|------|-------|-------|----|--------|
| Dorkovo          | MN14 | 42.03 | 24.13 | 8  | 0.3225 |
| Fonelas          | MN14 | 37.25 | -3.1  | 13 | 0.0275 |
| Kolle            | MN14 | 16.33 | 19    | 14 | 0.005  |
| Kossom Bougoudi  | MN14 | 16.33 | 18.66 | 17 | 0.0225 |
| Kosyakino        | MN14 | 43.9  | 46.67 | 14 | 0.3525 |
| La Gloria        | MN14 | 40.23 | -5.48 | 7  | 0.695  |
| La Gloria 4      | MN14 | 40.38 | -1.06 | 10 | 0.3925 |
| Montpellier      | MN14 | 43.6  | 3.89  | 21 | 0.195  |
| Sahabi           | MN14 | 30.08 | 20.75 | 29 | 0.3575 |
| Trévoux          | MN14 | 45.93 | 4.76  | 7  | 0.15   |
| Calta 2          | MN15 | 40.23 | 32.54 | 14 | 0.2    |
| Capeni           | MN15 | 46.01 | 25.55 | 14 | 0.0575 |
| Costa S. Giacomo | MN15 | 42    | 14.41 | 11 | 0.1375 |
| Csarnota 2       | MN15 | 45.89 | 18.21 | 12 | 0.035  |
| Ivanovce         | MN15 | 48.2  | 17.9  | 8  | 0.295  |
| Kos              | MN15 | 36.89 | 27.28 | 8  | 0.115  |

|                      |      |       |       |    |        |
|----------------------|------|-------|-------|----|--------|
| La Calera            | MN15 | 39.31 | -5.15 | 11 | 0.32   |
| Layna                | MN15 | 41.05 | -2.19 | 11 | 0.16   |
| Malushteni           | MN15 | 46.13 | 28.08 | 12 | 0.0275 |
| Megalo Emvolon (MEV) | MN15 | 40.3  | 22.45 | 9  | 0.0725 |
| Montopoli            | MN15 | 43.5  | 11    | 10 | 0.2    |
| Muselievo            | MN15 | 43.3  | 24.4  | 10 | 0.2125 |
| Odessa Catacombs     | MN15 | 46.5  | 30.8  | 16 | 0.0125 |
| Perpignan            | MN15 | 42.68 | 2.88  | 23 | 0.0675 |
| Stavropol-Kavkazskij | MN15 | 45    | 42.1  | 10 | 0.67   |
| Weze 1               | MN15 | 50.08 | 18.78 | 11 | 0.3925 |
| Wölfersheim          | MN15 | 50.4  | 8.85  | 11 | 0.12   |
