# Supplementary material
Source: PubMed Central journal article supplement (PMC2715530)
Supplement: 0902598106_ST2_PDF.pdf [file 0902598106_ST2_PDF.pdf]

TABLE S2 The locality list with age correlation and mean hypsodonty values used for hypsodonty map in Figure 3

| NAME                | MN-unit | Latitude | Longitude | Number of hypsodonty records | Mean Hypsodonty |
|---------------------|---------|----------|-----------|------------------------------|-----------------|
| Achldorf            | MN09    | 48.43    | 12.36     | 3                            | 1               |
| Akin                | MN09    | 38.4     | 30.32     | 5                            | 1.8             |
| Alkcaköy (1-6)      | MN09    | 38.57    | 29.1      | 12                           | 1.4167          |
| Arapli (Igdebaglar) | MN09    | 40.65    | 27.14     | 3                            | 1.6667          |
| Atavaska            | MN09    | 47       | 28.8      | 6                            | 1.3333          |
| Aveiras de Baixo    | MN09    | 39.11    | -8.86     | 2                            | 1               |
| Azambujeira inf.    | MN09    | 39.26    | -8.78     | 3                            | 1               |
| Ballestar           | MN09    | 40.4     | 0.11      | 11                           | 1.1818          |
| Bermersheim         | MN09    | 49.77    | 8.09      | 4                            | 1               |
| Bonnefont           | MN09    | 43.25    | 0.35      | 3                            | 1               |
| Breitenbrunn        | MN09    | 49       | 11.6      | 3                            | 1               |
| Breitenfeld         | MN09    | 47.16    | 15.5      | 2                            | 1               |
| Buzhor 1            | MN09    | 46.56    | 28.16     | 7                            | 1.5714          |
| Buzhor 2            | MN09    | 44.56    | 28.16     | 4                            | 1.5             |

|                       |      |       |       |    |        |
|-----------------------|------|-------|-------|----|--------|
| Can Missert           | MN09 | 41.2  | 0.5   | 4  | 1      |
| Can Ponsic            | MN09 | 41.2  | 0.7   | 10 | 1      |
| Can Ponsic I          | MN09 | 41.53 | 2.07  | 19 | 1.1579 |
| Charmoille            | MN09 | 47.43 | 7.21  | 13 | 1.2308 |
| Das                   | MN09 | 42.35 | 1.86  | 4  | 1      |
| Dinotheriensande      | MN09 | 49    | 8     | 5  | 1      |
| Doué-la-Fontaine      | MN09 | 47.2  | -0.3  | 3  | 1      |
| Edeleny               | MN09 | 48.33 | 20.75 | 2  | 1      |
| El Firal              | MN09 | 42.36 | 1.45  | 13 | 1.2308 |
| Eldari I              | MN09 | 41.3  | 45.7  | 14 | 1.4286 |
| Eppelsheim            | MN09 | 49.72 | 8.97  | 21 | 1.1905 |
| Eskisubasi 2          | MN09 | 40.3  | 26.71 | 2  | 2.5    |
| Esme Akçaköy          | MN09 | 38.4  | 28.96 | 9  | 1.2222 |
| Esselborn             | MN09 | 49.7  | 8.1   | 11 | 1.0909 |
| Esvres - Upper Faluns | MN09 | 47.3  | 0.8   | 6  | 1.3333 |
| Gaiselberg            | MN09 | 48.53 | 16.71 | 5  | 1.4    |
| Gau-Weinheim          | MN09 | 49.84 | 8.04  | 6  | 1.1667 |
| Giggenhausen          | MN09 | 48.22 | 11.39 | 2  | 1      |
| Götzendorf            | MN09 | 48    | 16.58 | 6  | 1.3333 |

|                               |      |       |       |    |        |
|-------------------------------|------|-------|-------|----|--------|
| Grakali                       | MN09 | 41.93 | 44.3  | 2  | 2      |
| Grosslappen (Flinz)           | MN09 | 48.2  | 11.6  | 2  | 1      |
| Hammerschmiede                | MN09 | 47.9  | 10.61 | 3  | 1      |
| Himberg                       | MN09 | 48.1  | 16.5  | 2  | 1      |
| Hinterauerbach                | MN09 | 48.4  | 12.01 | 3  | 1      |
| Hostalets de Pierola Superior | MN09 | 41.2  | 0.5   | 10 | 1.2    |
| Höwenegg                      | MN09 | 47.7  | 8.7   | 5  | 1.4    |
| Inönu 2                       | MN09 | 40.22 | 32.59 | 3  | 2      |
| Inzersdorf                    | MN09 | 48.13 | 16.33 | 2  | 2      |
| Isakovo                       | MN09 | 47.22 | 28.43 | 5  | 1.6    |
| Kalfa                         | MN09 | 46.54 | 29.23 | 11 | 1.1818 |
| Kishinev                      | MN09 | 47    | 28.85 | 2  | 2      |
| Laaerberg                     | MN09 | 48.16 | 16.4  | 3  | 1.6667 |
| Lapushna                      | MN09 | 46.9  | 28.5  | 3  | 1      |
| Los Valles de Fuentidueña     | MN09 | 41    | -4.2  | 9  | 1.2222 |
| Mariathal                     | MN09 | 48.6  | 16.1  | 2  | 2      |
| Masia de la Roma 2            | MN09 | 40.5  | -1    | 2  | 2      |
| Massenhausen                  | MN09 | 48.4  | 11.8  | 12 | 1      |

|                     |      |       |       |    |        |
|---------------------|------|-------|-------|----|--------|
| Melchingen          | MN09 | 48.36 | 9.15  | 3  | 1.3333 |
| Middle Sinap        | MN09 | 40.56 | 32.7  | 8  | 1.375  |
| Mistelbach          | MN09 | 48.6  | 16.5  | 3  | 1      |
| München             | MN09 | 48.2  | 11.5  | 2  | 1      |
| Natlismtsemeli I    | MN09 | 41.31 | 45.21 | 4  | 2      |
| Nebelbergweg        | MN09 | 47.38 | 7.63  | 2  | 1      |
| Nikolsburg          | MN09 | 48.8  | 16.63 | 2  | 1.5    |
| Nombrevilla         | MN09 | 41.07 | -1.21 | 10 | 1.2    |
| Oberföhring         | MN09 | 48.1  | 11.38 | 2  | 1      |
| Oberhollabrunn      | MN09 | 48.55 | 16.06 | 3  | 1      |
| Pedregueras 2A      | MN09 | 38.48 | 0.02  | 2  | 3      |
| Pentalophos 1 (PNT) | MN09 | 41    | 23    | 11 | 1.6364 |
| Priay II            | MN09 | 46    | 5.3   | 3  | 1      |
| Rudabánya           | MN09 | 48.71 | 20.63 | 18 | 1.2222 |
| Salmendingen        | MN09 | 48.35 | 9.1   | 3  | 1.3333 |
| Santiga             | MN09 | 41.2  | 0.5   | 10 | 1.2    |
| Seu d'Urgel         | MN09 | 42.3  | 1.6   | 2  | 1      |
| Sinap 108           | MN09 | 40.54 | 32.7  | 6  | 2.3333 |
| Sinap 114           | MN09 | 40.55 | 32.71 | 2  | 2      |

|                    |      |       |       |    |        |
|--------------------|------|-------|-------|----|--------|
| Sinap 14           | MN09 | 40.53 | 32.62 | 2  | 2.5    |
| Sinap 4            | MN09 | 40.55 | 32.69 | 6  | 1.5    |
| Sinap 40           | MN09 | 40.56 | 32.7  | 2  | 2      |
| Sinap 45           | MN09 | 40.53 | 32.66 | 3  | 1.6667 |
| Sinap 51           | MN09 | 40.56 | 32.7  | 5  | 1.6    |
| Sinap 64           | MN09 | 40.56 | 32.7  | 2  | 2      |
| Sinap 72           | MN09 | 40.56 | 32.7  | 7  | 2      |
| Sinap 88           | MN09 | 40.56 | 32.7  | 2  | 3      |
| Sinap 8A           | MN09 | 40.54 | 32.7  | 2  | 2      |
| Sinap 8B           | MN09 | 40.54 | 32.7  | 4  | 2.5    |
| Sinap 91           | MN09 | 40.55 | 32.71 | 6  | 2      |
| Sinap 94           | MN09 | 40.55 | 32.69 | 6  | 1.5    |
| Subsol de Sabadell | MN09 | 41.33 | 2.07  | 10 | 1.3    |
| Sümeg              | MN09 | 47    | 17.3  | 2  | 3      |
| Tasocagi mevkii    | MN09 | 40.1  | 26.23 | 2  | 2      |
| Trie-sur-Baïse     | MN09 | 43.33 | 0.36  | 3  | 1      |
| Varnitsa           | MN09 | 47.2  | 28.9  | 7  | 1.5714 |
| Vösendorf          | MN09 | 48.1  | 16.31 | 7  | 1.2857 |
| Wartenberg         | MN09 | 48.4  | 11.98 | 9  | 1.1111 |

|                  |      |       |       |    |        |
|------------------|------|-------|-------|----|--------|
| Westhofen        | MN09 | 49.55 | 8.25  | 6  | 1      |
| Wien 10          | MN09 | 48.2  | 16.4  | 2  | 1      |
| Wien 12          | MN09 | 48.2  | 16.3  | 2  | 1      |
| Wien 3           | MN09 | 48.2  | 16.4  | 2  | 1      |
| Wien-Belvedere   | MN09 | 48.2  | 16.4  | 3  | 1      |
| Wissberg         | MN09 | 49.85 | 8.02  | 17 | 1      |
| Zheltokamenka    | MN09 | 45.26 | 33.45 | 6  | 1.5    |
| Zistersdorf      | MN09 | 48.5  | 16.7  | 2  | 1      |
| Berislav         | MN10 | 46.83 | 33.42 | 3  | 1.3333 |
| Can Llobateres I | MN10 | 41.2  | 0.7   | 22 | 1.2273 |
| Can Purull       | MN10 | 41.55 | 1.97  | 13 | 1.3077 |
| Can Trull+s      | MN10 | 41.55 | 1.96  | 2  | 1.5    |
| Croix-Rousse     | MN10 | 45.78 | 4.83  | 2  | 1      |
| Grossulovo       | MN10 | 47.35 | 30    | 4  | 1.75   |
| Gülpinar         | MN10 | 39.53 | 26.11 | 14 | 1.8571 |
| Harmancik        | MN10 | 39.71 | 29.2  | 3  | 2.6667 |
| Incirlikdere     | MN10 | 40.09 | 26.21 | 3  | 2      |
| La Cantera       | MN10 | 40.06 | -1.01 | 4  | 1.5    |
| La Roma 2        | MN10 | 40.66 | -1.01 | 10 | 1.6    |

|                         |      |       |       |    |        |
|-------------------------|------|-------|-------|----|--------|
| La Tarumba I            | MN10 | 41.55 | 1.97  | 10 | 1.3    |
| Mahmutlu                | MN10 | 39.44 | 34.52 | 4  | 1.5    |
| Masia del Barbo         | MN10 | 40.4  | -1.1  | 5  | 1.6    |
| Masia del Barbo 2       | MN10 | 40.66 | 0.83  | 5  | 1.6    |
| Masia del Barbo 2B      | MN10 | 40.66 | -1.16 | 5  | 1.6    |
| Montredon               | MN10 | 44.4  | 3.36  | 10 | 1.6    |
| Novoukrainka            | MN10 | 48.3  | 31.5  | 3  | 1.6667 |
| Orignac                 | MN10 | 43.11 | 0.16  | 3  | 1.3333 |
| Poksheshty              | MN10 | 47.24 | 28.68 | 8  | 1.875  |
| Prottes                 | MN10 | 48.33 | 16.75 | 2  | 2      |
| Ravin de la Pluie (RPL) | MN10 | 41    | 22.95 | 11 | 1.7273 |
| Ravin des Zouaves 1     | MN10 | 41    | 22.95 | 5  | 2.4    |
| Respopeny               | MN10 | 47.45 | 28.36 | 8  | 1.625  |
| Sant Miquel de Taudell  | MN10 | 41.55 | 1.98  | 11 | 1.2727 |
| Sargi yeri              | MN10 | 40.1  | 26.22 | 2  | 2      |
| Schwechat               | MN10 | 48.13 | 16.46 | 2  | 2      |
| Selcik                  | MN10 | 38.44 | 30.29 | 3  | 2      |
| Sinap 1                 | MN10 | 40.54 | 32.69 | 4  | 1      |
| Sinap 12                | MN10 | 40.56 | 32.7  | 14 | 1.9286 |

|                   |      |       |       |    |        |
|-------------------|------|-------|-------|----|--------|
| Sinap 46          | MN10 | 40.53 | 32.64 | 2  | 3      |
| Sinap 49          | MN10 | 40.58 | 32.93 | 17 | 1.5882 |
| Sinap 50          | MN10 | 40.52 | 32.65 | 2  | 3      |
| Sinap 58          | MN10 | 40.54 | 32.63 | 2  | 2      |
| Sinap 83          | MN10 | 40.55 | 32.69 | 2  | 1      |
| Soblay            | MN10 | 45.1  | 5.5   | 5  | 1.6    |
| Stratzing         | MN10 | 48.45 | 15.6  | 3  | 1.6667 |
| Terrassa          | MN10 | 41.56 | 2     | 15 | 1.3333 |
| Tokmacik          | MN10 | 38.23 | 31.01 | 2  | 2.5    |
| Udabno I          | MN10 | 41.31 | 45.23 | 8  | 1.5    |
| Udabno II         | MN10 | 41.31 | 45.23 | 4  | 1.75   |
| Xirochori 1 (XIR) | MN10 | 41    | 23    | 3  | 2      |
| Yemliha           | MN10 | 38.85 | 35.27 | 2  | 2.5    |
| Yeniyaylacik      | MN10 | 38.77 | 34.61 | 2  | 1      |
| Yukseki           | MN10 | 38.81 | 34.52 | 3  | 2      |
| Yulafli (CY)      | MN10 | 41.2  | 27.82 | 10 | 1.3    |
| Akcayir (1,2,3)   | MN11 | 39.74 | 30.4  | 2  | 2      |
| Arkneti           | MN11 | 42.13 | 43.51 | 2  | 1.5    |
| Asagicigil 2      | MN11 | 38.04 | 31.82 | 3  | 2.3333 |



|                               |      |       |       |    |        |
|-------------------------------|------|-------|-------|----|--------|
| Baccinello V0                 | MN11 | 42.7  | 11.1  | 2  | 2      |
| Bala Yaylaköy                 | MN11 | 39.74 | 33.08 | 9  | 1.4444 |
| Basbereket                    | MN11 | 40.07 | 32.38 | 3  | 2.3333 |
| Cevril 1                      | MN11 | 38.93 | 35.46 | 3  | 1.6667 |
| Cicekliköy                    | MN11 | 38.49 | 27.28 | 2  | 2.5    |
| Corakyerler                   | MN11 | 40.6  | 33.63 | 9  | 1.8889 |
| Crevillente 2                 | MN11 | 38.4  | -0.5  | 10 | 1.3    |
| Csakvar                       | MN11 | 47.4  | 18.5  | 10 | 1.7    |
| Dadasun 1                     | MN11 | 38.81 | 35.55 | 4  | 2      |
| Djebel Krechem el<br>Artsouma | MN11 | 34    | 9     | 6  | 1.6667 |
| Dorn Dürkheim 1               | MN11 | 49.77 | 8.26  | 16 | 1.25   |
| Eldari II & III               | MN11 | 41.3  | 45.7  | 3  | 2.3333 |
| Eminova                       | MN11 | 40.11 | 31.95 | 3  | 1.6667 |
| Garkin                        | MN11 | 38.41 | 30.31 | 9  | 1.6667 |
| Gökdere                       | MN11 | 39.83 | 30.68 | 2  | 2.5    |
| Haliminhani 1                 | MN11 | 39.73 | 36.83 | 2  | 2.5    |
| Haliminhani 4                 | MN11 | 39.73 | 36.83 | 3  | 1.6667 |
| Injana                        | MN11 | 34.33 | 44.66 | 15 | 1.5333 |

|                      |      |       |       |    |        |
|----------------------|------|-------|-------|----|--------|
| Kalimanci 1          | MN11 | 42.5  | 23.1  | 8  | 1.875  |
| Karacahasan          | MN11 | 39.86 | 33.24 | 9  | 1.8889 |
| Karacay              | MN11 | 40.2  | 34.27 | 3  | 1.6667 |
| Kayadibi             | MN11 | 37.21 | 30.8  | 12 | 1.4167 |
| Kayadibi 3           | MN11 | 37.59 | 32.26 | 3  | 1.6667 |
| Kemiklitepe D        | MN11 | 37.5  | 29    | 7  | 2      |
| Kocherinovo 1        | MN11 | 42    | 23.08 | 3  | 2      |
| Kocherinovo 2        | MN11 | 42.03 | 23.08 | 5  | 1.4    |
| Küçükçekmece         | MN11 | 40.98 | 28.76 | 11 | 1.4545 |
| Kujalnitskij liman   | MN11 | 46.5  | 30.8  | 6  | 2.1667 |
| Lower Maragheh       | MN11 | 38    | 46    | 8  | 2      |
| Mancusun (Yesilyurt) | MN11 | 38.8  | 35.62 | 2  | 2      |
| Musaköy              | MN11 | 40.19 | 26.52 | 3  | 2      |
| Nikiti 1 (NKT)       | MN11 | 40    | 23.5  | 9  | 1.6667 |
| Nikiti 2 (NIK)       | MN11 | 40    | 23.5  | 7  | 1.8571 |
| Novo-Elizavetovka 2  | MN11 | 47    | 31    | 2  | 1.5    |
| Olukbasi             | MN11 | 37.66 | 28.47 | 2  | 2.5    |
| Peralejos D          | MN11 | 40.48 | -1.03 | 2  | 2      |
| Pichugino            | MN11 | 47.97 | 33.4  | 2  | 1.5    |

|                            |      |       |       |    |        |
|----------------------------|------|-------|-------|----|--------|
| Piera                      | MN11 | 41.2  | 0.5   | 9  | 1.3333 |
| Puente Minero              | MN11 | 40.36 | -1.08 | 8  | 1.625  |
| Pyrgos Vassilissis         | MN11 | 38.01 | 23.73 | 8  | 1.625  |
| Ravin des Zouaves 5        | MN11 | 41    | 22.95 | 16 | 1.625  |
| Rhodes                     | MN11 | 36.16 | 28    | 2  | 2.5    |
| Sabuncubaglari 1           | MN11 | 41.68 | 26.59 | 3  | 1.6667 |
| Samos-Q6                   | MN11 | 37.75 | 26.97 | 5  | 2.2    |
| Samos-Qx                   | MN11 | 37.75 | 26.97 | 2  | 1.5    |
| Sarihasan                  | MN11 | 39.78 | 36.82 | 4  | 1.5    |
| Servia                     | MN11 | 40.18 | 22    | 3  | 1.6667 |
| Sinap 34                   | MN11 | 40.55 | 32.64 | 4  | 2.25   |
| Sinap 63                   | MN11 | 40.63 | 32.65 | 4  | 2.5    |
| Strumyani 1                | MN11 | 42.83 | 23.08 | 2  | 1.5    |
| Strumyani 2                | MN11 | 42.83 | 23.1  | 3  | 1      |
| Tanagra                    | MN11 | 38.31 | 23.53 | 3  | 2      |
| Tiraspol (Kolkotova Balka) | MN11 | 46.83 | 29.6  | 5  | 1.8    |
| Triada                     | MN11 | 38.5  | 23.5  | 3  | 2      |
| Vivero de Pinos            | MN11 | 40.33 | -1.08 | 4  | 1.5    |
| Yigitlerkoy 1 (Turbe Tepe) | MN11 | 39.29 | 34.97 | 2  | 2.5    |

|                         |      |       |       |    |        |
|-------------------------|------|-------|-------|----|--------|
| Yigitlerkoy 2           | MN11 | 39.31 | 34.99 | 2  | 2.5    |
| Achladi                 | MN12 | 38.5  | 23.5  | 4  | 2.25   |
| Achmet Aga              | MN12 | 38.41 | 23.5  | 3  | 2.6667 |
| Akgedik-Bayir           | MN12 | 37.25 | 28.25 | 8  | 2.125  |
| Akkasdagi               | MN12 | 38.49 | 33.64 | 16 | 2.0625 |
| Alifakas                | MN12 | 39.5  | 22.5  | 3  | 2.3333 |
| Aljezar B               | MN12 | 40.33 | -1.08 | 2  | 2      |
| Ano Metochi             | MN12 | 41    | 23.5  | 2  | 2.5    |
| Asarintepe              | MN12 | 40.19 | 32.5  | 2  | 3      |
| Baccinello V1           | MN12 | 42.7  | 11.1  | 5  | 2      |
| Baccinello V2           | MN12 | 42.7  | 11.1  | 6  | 1.5    |
| Baltavar                | MN12 | 47    | 17    | 11 | 1.5455 |
| Batakcesme              | MN12 | 41.75 | 26.58 | 2  | 2      |
| Bayat 1                 | MN12 | 39.34 | 29.81 | 2  | 2.5    |
| Belka                   | MN12 | 50.81 | 28.18 | 9  | 1.4444 |
| Casa del Acero          | MN12 | 38.1  | -0.5  | 3  | 1.6667 |
| Casteani                | MN12 | 42.5  | 11.15 | 5  | 1.4    |
| Cerro de la Garita      | MN12 | 40.38 | -1.08 | 13 | 1.2308 |
| Chimishlija (Cimislija) | MN12 | 46.5  | 28.8  | 19 | 1.4737 |

|                          |      |       |       |    |        |
|--------------------------|------|-------|-------|----|--------|
| Chobruchi (Tchobroutchi) | MN12 | 46.6  | 29.7  | 15 | 1.6667 |
| Chomateres               | MN12 | 38.08 | 23.88 | 10 | 1.5    |
| Çobanpınar (Sinap 42)    | MN12 | 40.21 | 32.53 | 10 | 1.8    |
| Concud                   | MN12 | 40.4  | -1.13 | 11 | 1.2727 |
| Concud barranco          | MN12 | 40.4  | -1.01 | 6  | 1.5    |
| Cöpköy                   | MN12 | 41.21 | 26.83 | 2  | 2      |
| Crevillente 15           | MN12 | 38.25 | -0.8  | 8  | 1.375  |
| Crevillente 16           | MN12 | 38.23 | -0.8  | 6  | 1.3333 |
| Develiköy 1              | MN12 | 38.68 | 27.65 | 2  | 2.5    |
| Duzyayla                 | MN12 | 39.92 | 37.31 | 8  | 1.625  |
| Ebic                     | MN12 | 38.8  | 35.65 | 2  | 1.5    |
| Elekci                   | MN12 | 37.34 | 28.17 | 3  | 1.6667 |
| Eski Bayirköy            | MN12 | 37.26 | 28.26 | 4  | 2.25   |
| Fiume Santo              | MN12 | 40.8  | 8.3   | 5  | 1.6    |
| Gelibolu Bayirköy        | MN12 | 40.37 | 26.56 | 2  | 2.5    |
| Gorna Susica             | MN12 | 41.83 | 23.08 | 7  | 1.7143 |
| Grebeniki                | MN12 | 46.88 | 29.81 | 15 | 1.7333 |
| Gura-Galben              | MN12 | 46.42 | 28.42 | 9  | 1.5556 |
| Hadjidimovo-1            | MN12 | 41.5  | 23.83 | 20 | 1.5    |

|                      |      |       |       |    |        |
|----------------------|------|-------|-------|----|--------|
| Halmyropotamos (HAL) | MN12 | 38.5  | 24.2  | 13 | 1.5385 |
| Kalimanci 2          | MN12 | 42.5  | 23.1  | 10 | 1.7    |
| Kalimanci 3          | MN12 | 42.5  | 23.1  | 4  | 1.75   |
| Kalimanci 4          | MN12 | 42.5  | 23.1  | 3  | 2      |
| Kalimantsi-Pehtsata  | MN12 | 42.5  | 23.1  | 3  | 1.3333 |
| Karain 2             | MN12 | 38.58 | 34.98 | 2  | 2.5    |
| Kavakdere (Turolian) | MN12 | 40.24 | 32.56 | 5  | 2      |
| Kefraya              | MN12 | 33.75 | 35.75 | 8  | 1.75   |
| Keltepeler 2         | MN12 | 40.18 | 26.26 | 2  | 1.5    |
| Kemiklitepe 1,2      | MN12 | 38.39 | 29.14 | 14 | 1.9286 |
| Kemiklitepe A-B      | MN12 | 37.5  | 29    | 10 | 2      |
| Kerassia             | MN12 | 38.5  | 23    | 2  | 1      |
| Kerassia 1           | MN12 | 38.5  | 23    | 9  | 1.7778 |
| Kerassia 3           | MN12 | 38.5  | 23    | 3  | 2      |
| Kerassia 4           | MN12 | 38.5  | 23    | 6  | 1.5    |
| Kerassia 5           | MN12 | 38.5  | 23    | 2  | 2      |
| Kizilören            | MN12 | 37.85 | 32.1  | 7  | 1.5714 |
| Kromidovo 2          | MN12 | 41.45 | 23.36 | 4  | 2      |
| Las Pedrizas         | MN12 | 36.83 | -4.5  | 3  | 1.6667 |

|                    |      |       |       |    |        |
|--------------------|------|-------|-------|----|--------|
| Lassnitz           | MN12 | 47.1  | 15.6  | 2  | 1      |
| Los Aljezares      | MN12 | 37.75 | -0.85 |    |        |
| Los Mansuetos      | MN12 | 40.35 | -1.11 | 11 | 1.4545 |
| M-U Maragheh       | MN12 | 38    | 46    | 22 | 2.0455 |
| Mahmutgazi         | MN12 | 38.02 | 29.4  | 9  | 1.6667 |
| Masada del Valle 2 | MN12 | 40.38 | -0.43 | 2  | 2      |
| Monte Bamboli      | MN12 | 43.2  | 10.7  | 4  | 1.5    |
| Montemassi         | MN12 | 42.9  | 11    | 2  | 2      |
| Mt. Luberon        | MN12 | 43.7  | 5.4   | 4  | 1.75   |
| Mytilinii 1A       | MN12 | 37.75 | 26.96 | 9  | 2.1111 |
| Mytilinii 1B       | MN12 | 37.75 | 26.96 | 8  | 2.25   |
| Mytilinii 1C       | MN12 | 37.75 | 26.96 | 3  | 1.6667 |
| Mytilinii 3        | MN12 | 37.75 | 26.96 | 4  | 2.25   |
| Mytilinii 4        | MN12 | 37.75 | 26.96 | 6  | 1.8333 |
| Novaja Emetovka    | MN12 | 46.65 | 30.6  | 11 | 1.7273 |
| Novo-Elizavetovka  | MN12 | 47    | 31    | 14 | 1.5    |
| Özluce             | MN12 | 37.24 | 28.52 | 3  | 2.6667 |
| Perivolaki         | MN12 | 38.41 | 23.5  | 11 | 1.9091 |
| Pikermi            | MN12 | 38.01 | 23.99 | 25 | 1.52   |

|                      |      |       |       |    |        |
|----------------------|------|-------|-------|----|--------|
| Pinaryaka            | MN12 | 41.19 | 32.49 | 6  | 1.5    |
| Prochoma             | MN12 | 41    | 22.93 | 12 | 1.6667 |
| Ravin Ar.            | MN12 | 38.41 | 23.48 | 4  | 2      |
| Ravin X              | MN12 | 38.4  | 23.48 | 9  | 1.6667 |
| Ribolla              | MN12 | 43    | 11.1  | 2  | 2      |
| Salihpasalar         | MN12 | 37.25 | 28.27 | 10 | 1.7    |
| Salihpasalar 1       | MN12 | 37.25 | 28.25 | 7  | 1.5714 |
| Salihpasalar 2       | MN12 | 37.25 | 28.26 | 6  | 1.5    |
| Samos Main Bone Beds | MN12 | 37.5  | 26.87 | 35 | 1.9429 |
| Samos Old Mill Beds  | MN12 | 37.5  | 26.87 | 4  | 2.5    |
| Samos White Sands    | MN12 | 37.5  | 26.87 | 5  | 2.2    |
| Samos-Q5             | MN12 | 37.75 | 26.97 | 8  | 1.875  |
| Sarisikinleri        | MN12 | 37.6  | 32.27 | 2  | 2      |
| Sazak                | MN12 | 37.29 | 28.83 | 3  | 2      |
| Serefköy             | MN12 | 37.36 | 28.22 | 11 | 1.9091 |
| Serrazzano           | MN12 | 43.6  | 10.8  | 2  | 2      |
| Sinap 26             | MN12 | 40.56 | 32.64 | 10 | 1.9    |
| Sinap 27             | MN12 | 40.56 | 32.64 | 4  | 2.25   |
| Sinap 33             | MN12 | 40.55 | 32.64 | 10 | 1.8    |



|                     |      |       |       |    |        |
|---------------------|------|-------|-------|----|--------|
| Sinap 70            | MN12 | 40.55 | 32.64 | 2  | 2.5    |
| Thermopigi          | MN12 | 41.28 | 23.36 | 11 | 1.7273 |
| Tudorovo            | MN12 | 46.26 | 30.03 | 6  | 1.6667 |
| Ulas                | MN12 | 37.21 | 27.82 | 2  | 2.5    |
| Valdecebro 5        | MN12 | 40.35 | -1.03 | 2  | 2      |
| Vathylakkos 1 (VLO) | MN12 | 41    | 23    | 3  | 1.6667 |
| Vathylakkos 2 (VTK) | MN12 | 41    | 23    | 9  | 1.5556 |
| Vathylakkos 3 (VAT) | MN12 | 41    | 23    | 15 | 1.4667 |
|                     |      |       |       |    |        |
|                     |      |       |       |    |        |
|                     |      |       |       |    |        |
